# Supplementary material for: MicroRNA Expression Profiling Altered by Variant Dosage of Radiation Exposure
Source: Hindawi journal article supplement (doi:10.1155/2014/456323), 2014-01-01
Supplement: f1 [file 456323.f1.pdf]

Supplementary material 1. mirtar prediction

| microRNA       | microRNA_fold_change | gene_symbols | gene_fold_change | binding |
|----------------|----------------------|--------------|------------------|---------|
| hsa-miR-107    | 1.085757             | BST2         | -1.01332         | YES     |
| hsa-miR-107    | 1.085757             | CEP350       | -1.0824          | YES     |
| hsa-miR-107    | 1.085757             | CINP         | -1.196687        | YES     |
| hsa-miR-107    | 1.085757             | CRKL         | -1.228981        | YES     |
| hsa-miR-107    | 1.085757             | DGKA         | -1.265459        | YES     |
| hsa-miR-107    | 1.085757             | DLG1         | -1.124829        | YES     |
| hsa-miR-107    | 1.085757             | DNAJC9       | -1.849915        | YES     |
| hsa-miR-107    | 1.085757             | ENTPD1       | -1.022713        | YES     |
| hsa-miR-107    | 1.085757             | FUNDC2       | -1.114613        | YES     |
| hsa-miR-107    | 1.085757             | HAUS3        | -1.108768        | YES     |
| hsa-miR-107    | 1.085757             | KIAA1033     | -1.383965        | YES     |
| hsa-miR-107    | 1.085757             | LRRK2        | -1.022049        | YES     |
| hsa-miR-107    | 1.085757             | MACF1        | -1.053049        | YES     |
| hsa-miR-107    | 1.085757             | MME          | -1.346039        | YES     |
| hsa-miR-107    | 1.085757             | PPIL4        | -1.031364        | YES     |
| hsa-miR-107    | 1.085757             | RNASET2      | -1.044624        | YES     |
| hsa-miR-107    | 1.085757             | RPL5         | -1.434504        | YES     |
| hsa-miR-107    | 1.085757             | SNTB2        | -1.070127        | YES     |
| hsa-miR-107    | 1.085757             | SPTLC1       | -1.18119         | YES     |
| hsa-miR-107    | 1.085757             | TMEM2        | -1.050364        | YES     |
| hsa-miR-107    | 1.085757             | UHMK1        | -1.00323         | YES     |
| hsa-miR-107    | 1.085757             | YLPM1        | -1.431853        | YES     |
| hsa-miR-107    | 1.085757             | YWHAB        | -1.146669        | YES     |
| hsa-miR-20b-5p | 1.010934             | ARHGAP12     | -1.28223         | YES     |
| hsa-miR-20b-5p | 1.010934             | BAG1         | -1.480575        | YES     |
| hsa-miR-20b-5p | 1.010934             | BTN3A2       | -1.216127        | YES     |
| hsa-miR-20b-5p | 1.010934             | CCL5         | -1.103018        | YES     |
| hsa-miR-20b-5p | 1.010934             | CTSB         | -1.02047         | YES     |
| hsa-miR-20b-5p | 1.010934             | EEF1D        | -1.037083        | YES     |
| hsa-miR-20b-5p | 1.010934             | FAM129A      | -1.000626        | YES     |
| hsa-miR-20b-5p | 1.010934             | FGL2         | -1.328617        | YES     |
| hsa-miR-20b-5p | 1.010934             | GGNBP2       | -1.114713        | YES     |
| hsa-miR-20b-5p | 1.010934             | GIMAP8       | -1.105476        | YES     |
| hsa-miR-20b-5p | 1.010934             | GOSR1        | -1.128264        | YES     |
| hsa-miR-20b-5p | 1.010934             | HAUS3        | -1.108768        | YES     |

|                |          |          |           |     |
|----------------|----------|----------|-----------|-----|
| hsa-miR-20b-5p | 1.010934 | IFIT3    | -1.011254 | YES |
| hsa-miR-20b-5p | 1.010934 | IGSF6    | -1.269933 | YES |
| hsa-miR-20b-5p | 1.010934 | ITGAL    | -1.06241  | YES |
| hsa-miR-20b-5p | 1.010934 | LLPH     | -1.027615 | YES |
| hsa-miR-20b-5p | 1.010934 | MACF1    | -1.053049 | YES |
| hsa-miR-20b-5p | 1.010934 | MAF1     | -1.127237 | YES |
| hsa-miR-20b-5p | 1.010934 | MBTD1    | -1.038898 | YES |
| hsa-miR-20b-5p | 1.010934 | RANBP1   | -1.327268 | YES |
| hsa-miR-20b-5p | 1.010934 | SCP2     | -1.254943 | YES |
| hsa-miR-20b-5p | 1.010934 | SNTB2    | -1.070127 | YES |
| hsa-miR-20b-5p | 1.010934 | SPTLC1   | -1.18119  | YES |
| hsa-miR-20b-5p | 1.010934 | TCF7     | -1.207391 | YES |
| hsa-miR-20b-5p | 1.010934 | TEP1     | -1.182007 | YES |
| hsa-miR-20b-5p | 1.010934 | TTLL3    | -1.123415 | YES |
| hsa-miR-20b-5p | 1.010934 | ZNF394   | -1.108821 | YES |
| hsa-miR-17-5p  | 1.094021 | ANKRD11  | -1.597491 | YES |
| hsa-miR-17-5p  | 1.094021 | ARHGAP12 | -1.28223  | YES |
| hsa-miR-17-5p  | 1.094021 | BAG1     | -1.480575 | YES |
| hsa-miR-17-5p  | 1.094021 | BTN3A2   | -1.216127 | YES |
| hsa-miR-17-5p  | 1.094021 | CCL5     | -1.103018 | YES |
| hsa-miR-17-5p  | 1.094021 | CTSB     | -1.02047  | YES |
| hsa-miR-17-5p  | 1.094021 | EEF1D    | -1.037083 | YES |
| hsa-miR-17-5p  | 1.094021 | FAM129A  | -1.000626 | YES |
| hsa-miR-17-5p  | 1.094021 | FGL2     | -1.328617 | YES |
| hsa-miR-17-5p  | 1.094021 | GGNBP2   | -1.114713 | YES |
| hsa-miR-17-5p  | 1.094021 | GIMAP8   | -1.105476 | YES |
| hsa-miR-17-5p  | 1.094021 | GOSR1    | -1.128264 | YES |
| hsa-miR-17-5p  | 1.094021 | HAUS3    | -1.108768 | YES |
| hsa-miR-17-5p  | 1.094021 | IFIT3    | -1.011254 | YES |
| hsa-miR-17-5p  | 1.094021 | IGSF6    | -1.269933 | YES |
| hsa-miR-17-5p  | 1.094021 | ITGAL    | -1.06241  | YES |
| hsa-miR-17-5p  | 1.094021 | LLPH     | -1.027615 | YES |
| hsa-miR-17-5p  | 1.094021 | MACF1    | -1.053049 | YES |
| hsa-miR-17-5p  | 1.094021 | MAF1     | -1.127237 | YES |
| hsa-miR-17-5p  | 1.094021 | MBTD1    | -1.038898 | YES |
| hsa-miR-17-5p  | 1.094021 | MED23    | -1.149971 | YES |
| hsa-miR-17-5p  | 1.094021 | RANBP1   | -1.327268 | YES |
| hsa-miR-17-5p  | 1.094021 | SCP2     | -1.254943 | YES |

|                |          |          |           |     |
|----------------|----------|----------|-----------|-----|
| hsa-miR-17-5p  | 1.094021 | SNTB2    | -1.070127 | YES |
| hsa-miR-17-5p  | 1.094021 | SPTLC1   | -1.18119  | YES |
| hsa-miR-17-5p  | 1.094021 | TCF7     | -1.207391 | YES |
| hsa-miR-17-5p  | 1.094021 | TEP1     | -1.182007 | YES |
| hsa-miR-17-5p  | 1.094021 | TTLL3    | -1.123415 | YES |
| hsa-miR-17-5p  | 1.094021 | ZNF394   | -1.108821 | YES |
| hsa-miR-185-5p | 1.012046 | AMICA1   | -1.021901 | YES |
| hsa-miR-185-5p | 1.012046 | CASP4    | -1.417635 | YES |
| hsa-miR-185-5p | 1.012046 | CD79B    | -1.213594 | YES |
| hsa-miR-185-5p | 1.012046 | CD9      | -1.461641 | YES |
| hsa-miR-185-5p | 1.012046 | CNPY3    | -1.043983 | YES |
| hsa-miR-185-5p | 1.012046 | CSHL1    | -1.230325 | YES |
| hsa-miR-185-5p | 1.012046 | CYP11B1  | -1.123859 | YES |
| hsa-miR-185-5p | 1.012046 | CYP11B2  | -1.123859 | YES |
| hsa-miR-185-5p | 1.012046 | ENTPD1   | -1.022713 | YES |
| hsa-miR-185-5p | 1.012046 | ETV6     | -1.445229 | YES |
| hsa-miR-185-5p | 1.012046 | FAM129A  | -1.000626 | YES |
| hsa-miR-185-5p | 1.012046 | GABARAP  | -1.017526 | YES |
| hsa-miR-185-5p | 1.012046 | GLUL     | -1.454511 | YES |
| hsa-miR-185-5p | 1.012046 | GOSR1    | -1.128264 | YES |
| hsa-miR-185-5p | 1.012046 | HOPX     | -1.15993  | YES |
| hsa-miR-185-5p | 1.012046 | HSP90AA1 | -1.405428 | YES |
| hsa-miR-185-5p | 1.012046 | IL7R     | -1.202742 | YES |
| hsa-miR-185-5p | 1.012046 | LRRK2    | -1.022049 | YES |
| hsa-miR-185-5p | 1.012046 | PCNA     | -1.011372 | YES |
| hsa-miR-185-5p | 1.012046 | PELI1    | -1.162732 | YES |
| hsa-miR-185-5p | 1.012046 | PMF1     | -1.033985 | YES |
| hsa-miR-185-5p | 1.012046 | PSME1    | -1.283355 | YES |
| hsa-miR-185-5p | 1.012046 | RAB6A    | -1.04013  | YES |
| hsa-miR-185-5p | 1.012046 | RSU1     | -1.061515 | YES |
| hsa-miR-185-5p | 1.012046 | SDF2     | -1.245329 | YES |
| hsa-miR-185-5p | 1.012046 | TAF7     | -1.298485 | YES |
| hsa-miR-185-5p | 1.012046 | TCF7     | -1.207391 | YES |
| hsa-miR-185-5p | 1.012046 | TSHZ1    | -1.006175 | YES |
| hsa-miR-185-5p | 1.012046 | YWHAB    | -1.146669 | YES |
| hsa-miR-185-5p | 1.012046 | YWHAG    | -1.161326 | YES |
| hsa-miR-185-5p | 1.012046 | ZC3HAV1  | -1.860208 | YES |
